# Supplementary material for: Rapamycin Ameliorates Defects in Mitochondrial Fission and Mitophagy in Glioblastoma Cells
Source: Int J Mol Sci. 2021 May 20;22(10):5379. doi: 10.3390/ijms22105379 (PMC8161366; doi:10.3390/ijms22105379)
Supplement: Supplementary file 1 [file ijms-22-05379-s001.zip › ijms-1213319-supplementary.pdf]

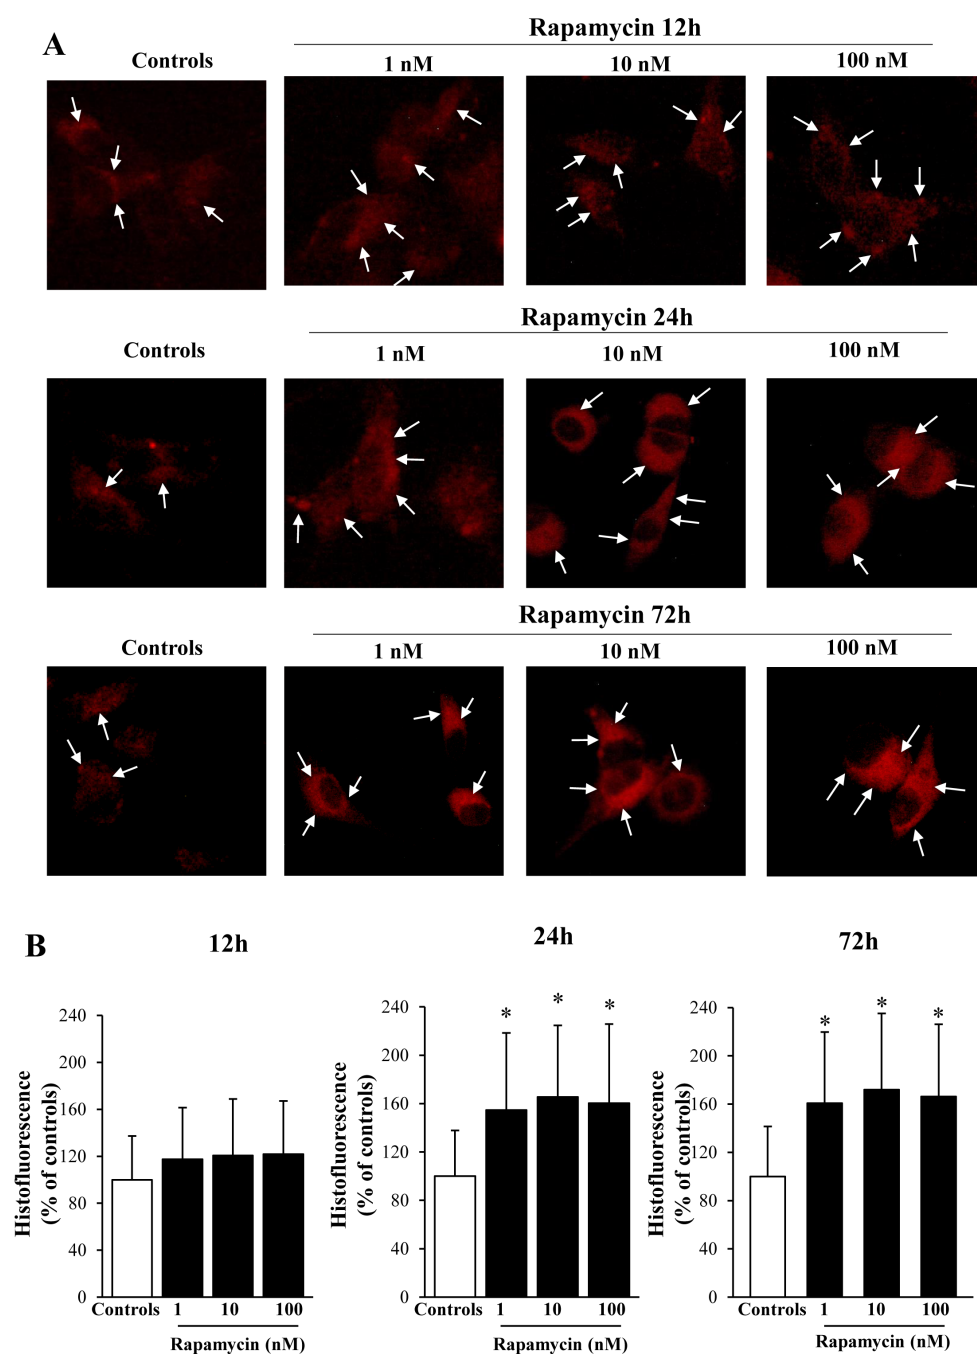

**Legend to Figure S1.** (A) Representative pictures stained with MitoTracker-Red showing healthy mitochondria (arrows) from control and rapamycin (1 nM, 10 nM, 100 nM) continuous exposure for (12h, 24h, 72h). (B) Graphs showing the percentage of MitoTracker-Red histofluorescence compared with control (histofluorescence, % of control) at 12h (left graph); 24h (middle graph); 72h (right graph) of continuous exposure to various doses of rapamycin (1 nM, 10 nM, 100 nM).

Counts represent the mean $\pm$ SD from N=50 cells per group.

\*P  $\leq$  0.05 compared with control. Scale Bar=20  $\mu$ m.

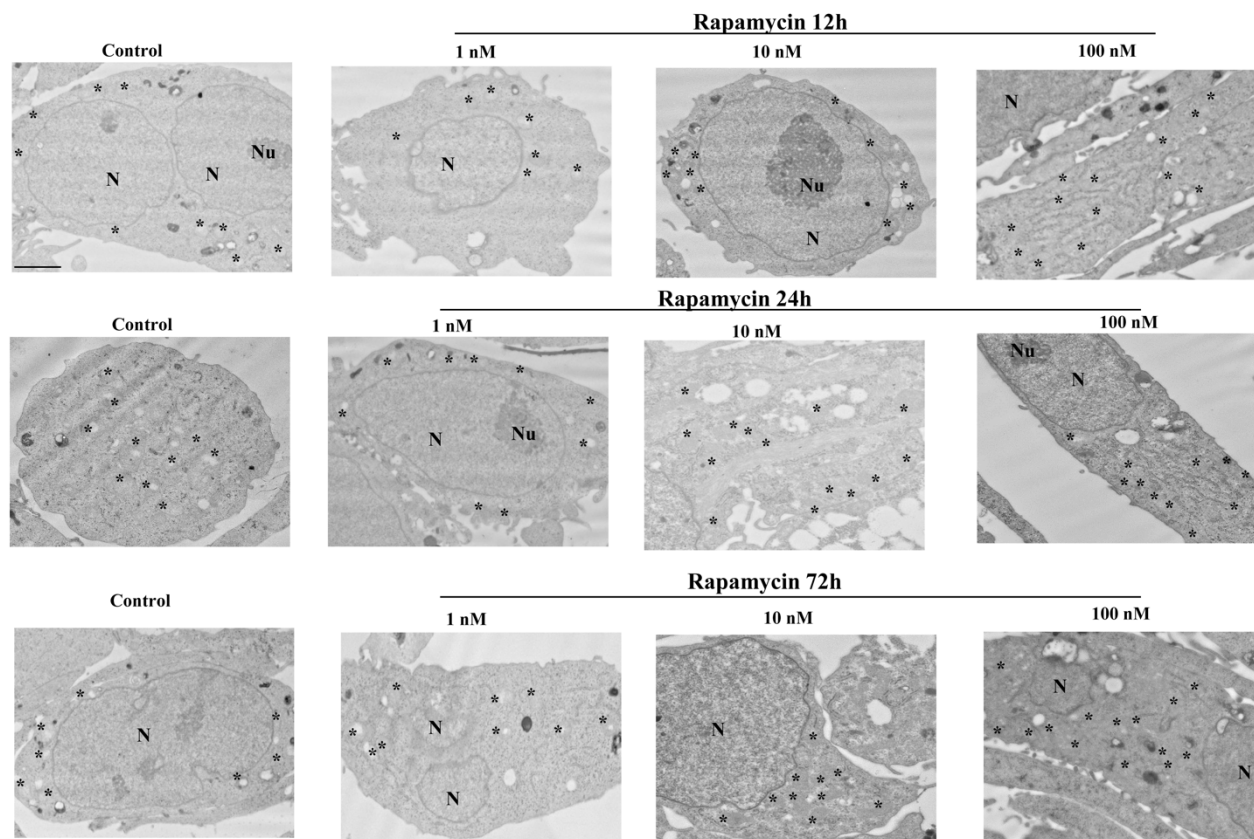

**Legend to Figure S2.** Representative TEM micrographs (low magnification) showing mitochondria (\*) from control and rapamycin (1 nM, 10 nM, 100 nM) continuous exposure (12h, 24h, 72h).

Scale Bar=3  $\mu$ m, N=nucleus, Nu=nucleolus.

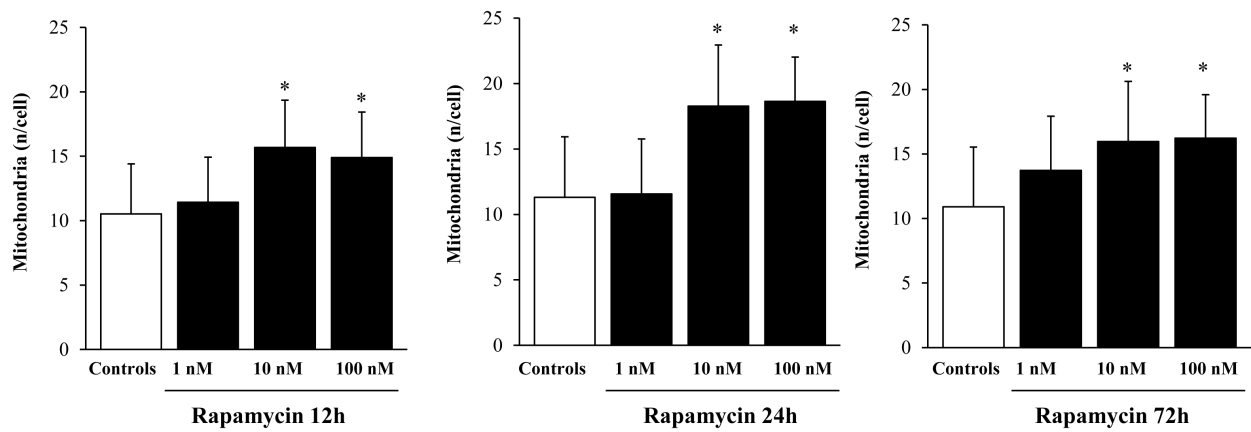

**Legend to Figure S3.** Graphs showing the number of mitochondria per cell at 12h (left graph); 24h (middle graph); 72h (right graph) of continuous exposure to various doses of rapamycin (1 nM, 10 nM, 100 nM).

Counts represent the mean $\pm$ SD from N=50 cells per group.

\* $P \leq 0.05$  compared with control.

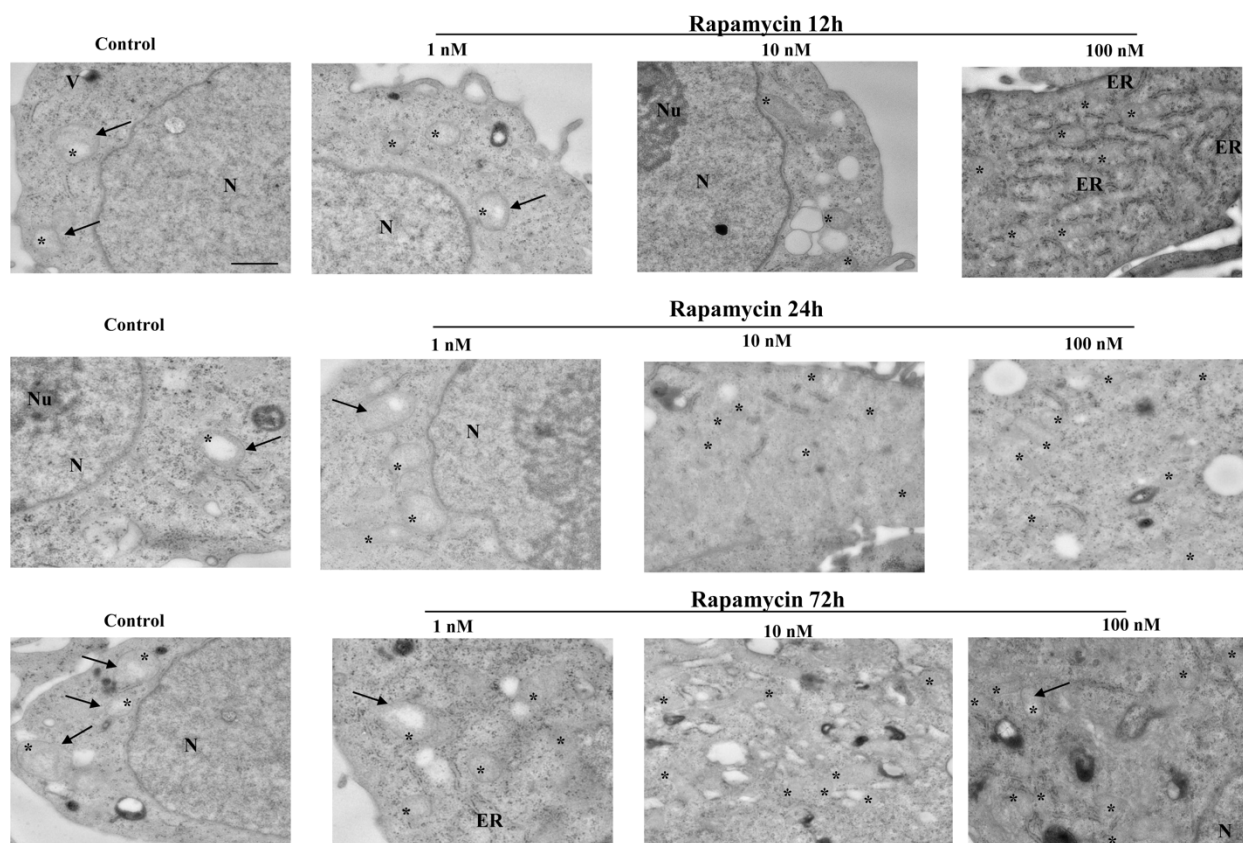

**Legend to Figure S4.** Representative TEM micrograph (high magnification) showing altered mitochondria (arrows) from control and rapamycin (1 nM, 10 nM, 100 nM) continuous exposure (12h, 24h, 72h).

Scale Bar=1 μm, Asterisk(\*)=mitochondria, N=nucleus, Nu=nucleolus, ER=endoplasmic reticulum.

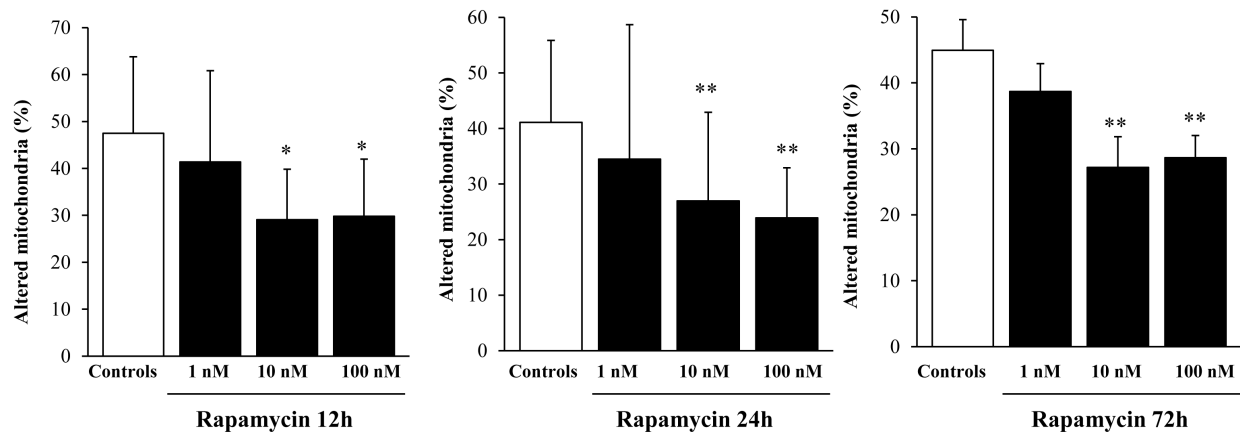

**Legend to Figure S5.** Graphs showing the percentage of altered mitochondria compared with control (altered mitochondria % of control) at 12h, 24h, 72h of continuous exposure to various doses of rapamycin (1 nM, 10 nM, 100 nM).

Counts represent the mean $\pm$ SD from N=50 cells per group.

\* $P \leq 0.05$  compared with control.

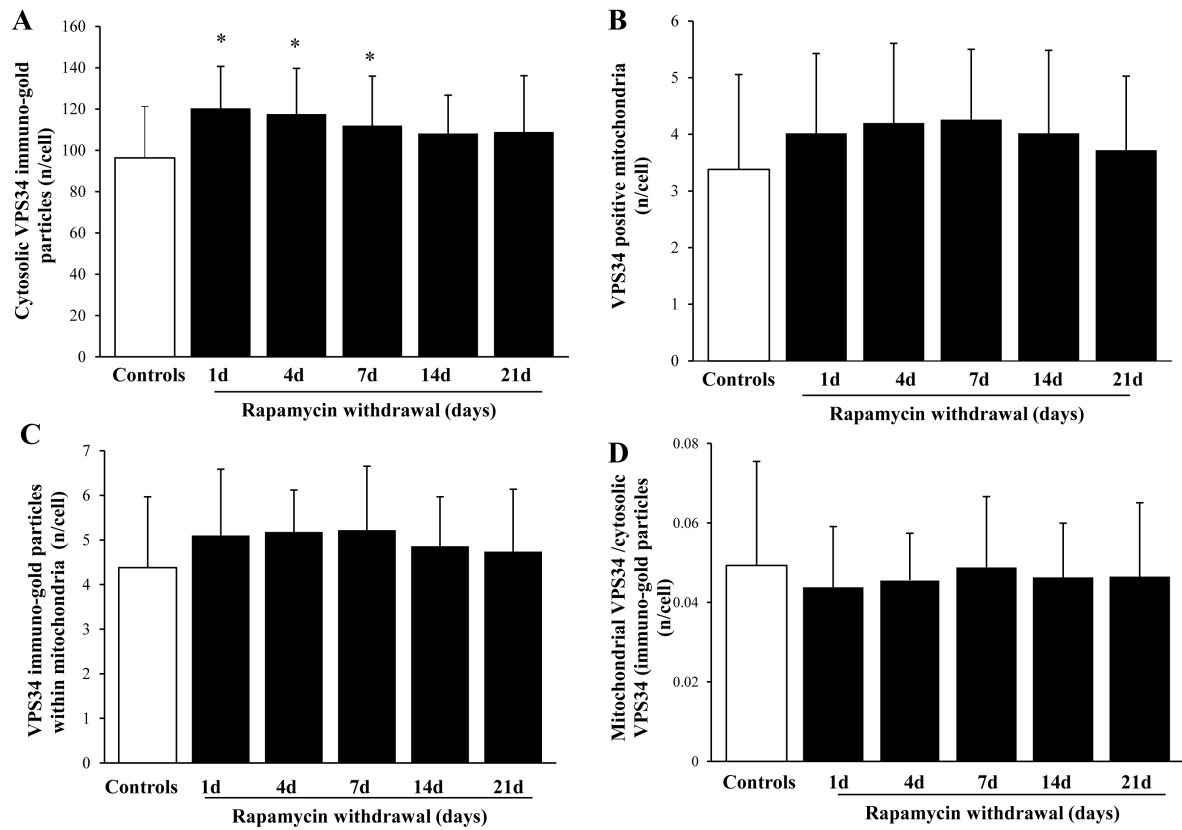

**Legend to Figure S6. Representative immuno-gold and topographical morphometry graphs for early autophagy marker VPS34.** Graphs report the cytosolic amount of VPS34 (**A**), the VPS34-positive mitochondria (**B**), the VPS34 immuno-gold particles within mitochondria (**C**) and the ratio of mitochondrial to cytosolic VPS34 immuno-gold particles (**D**).

Values reported in the graph correspond to the mean $\pm$ SD from N=50 cells per group.

\* $P \leq 0.05$  compared with controls.
